# Supplementary material for: Improved Pharmacokinetic Feasibilities of Mirabegron-1,2-Ethanedisulfonic Acid, Mirabegron-1,5-Naphthalenedisulfonic Acid, and Mirabegron-L-Pyroglutamic Acid as Co-Amorphous Dispersions in Rats and Mice
Source: MDPI journal article supplement (doi:10.3390/pharmaceutics15092277), 2023-09-04
Supplement: s1 [file s1]

# Supplementary Material

**Figure S1.** Representative chromatograms of MBR (upper) and IS (lower) (a) stock solution of 0.01  $\mu\text{g/mL}$  MBR and IS; (b) drug-free mouse plasma; (c) mouse plasma standard of 1  $\mu\text{g/mL}$  MBR; (d) mouse plasma sample at 30 min after oral administration of 50 mg/kg MBR; (e) drug-free mouse urine; (f) mouse urine standard of 10  $\mu\text{g/mL}$  MBR; (g) mouse urine sample collected at 24 h after oral administration of 50 mg/kg MBR; (h) drug-free mouse GI; (i) mouse GI standard of 1  $\mu\text{g/mL}$  MBR; (j) mouse GI sample collected at 24 h after oral administration of 50 mg/kg MBR.

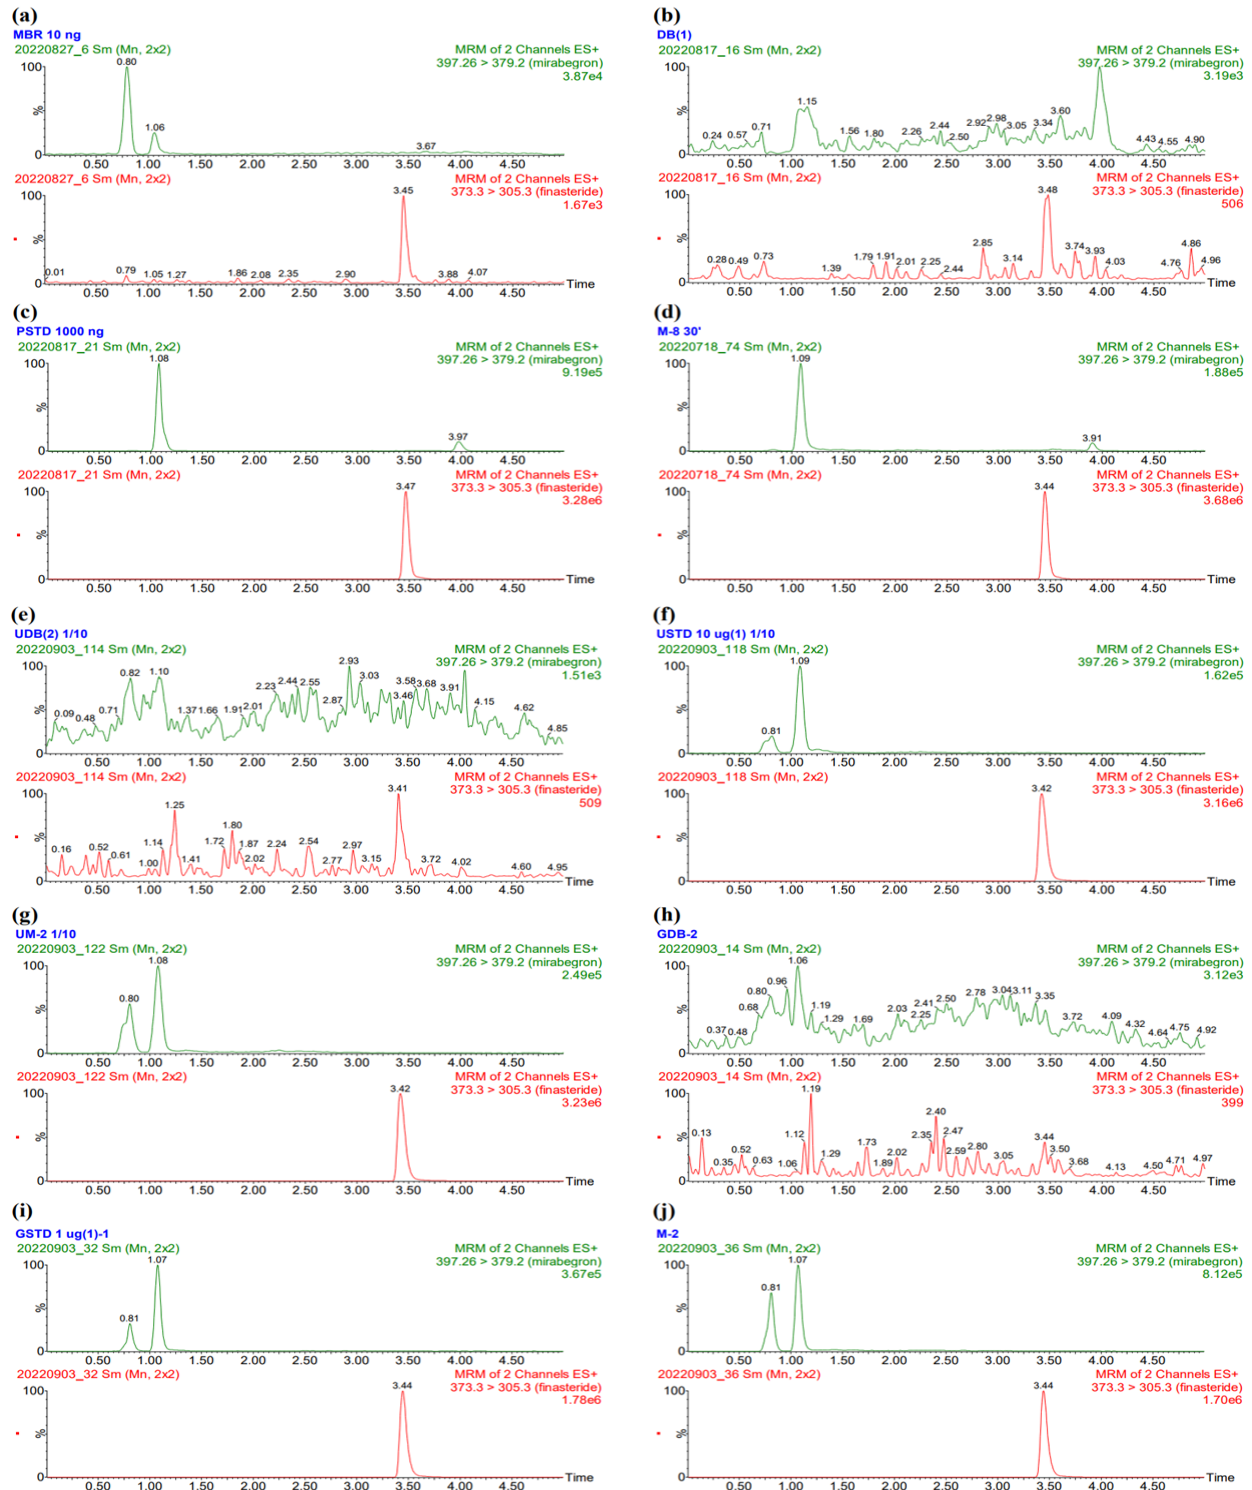

**Table S1.** Mean ( $\pm$  S.D.) concentrations and T/P ratios of MBR in plasma and various tissues at 0.5, 2, 4, 8, and 10 h after intravenous administration (5 mg/kg as MBR) and oral administration (50 mg/kg as MBR) of MBR or various formulations of MBR to mice. The units of MBR concentrations in plasma and tissues are presented in  $\mu\text{g/mL}$  and  $\mu\text{g/g}$  tissue, respectively.

| Parameter       | Intravenous                              | Oral                                    |                                         |                                        |                                         |
|-----------------|------------------------------------------|-----------------------------------------|-----------------------------------------|----------------------------------------|-----------------------------------------|
|                 | MBR                                      | MBR                                     | MBR-EFA                                 | MBR-NDA                                | MBR-PG                                  |
| <b>0.5 h</b>    |                                          |                                         |                                         |                                        |                                         |
| Plasma          | 0.0635 $\pm$ 0.0127                      | 0.0633 $\pm$ 0.0361                     | 0.313 $\pm$ 0.180                       | 0.135 $\pm$ 0.0198                     | 0.0589 $\pm$ 0.0126                     |
| Liver           | 2.53 $\pm$ 0.462<br>(41.8 $\pm$ 14.1)    | 7.47 $\pm$ 4.97<br>(131 $\pm$ 59.8)     | 9.33 $\pm$ 2.66<br>(34.5 $\pm$ 14.7)    | 13.9 $\pm$ 2.84<br>(102 $\pm$ 8.36)    | 12.9 $\pm$ 8.10<br>(219 $\pm$ 112)      |
| Kidney          | 2.67 $\pm$ 0.231<br>(42.8 $\pm$ 6.16)    | 9.20 $\pm$ 4.61<br>(154 $\pm$ 34.7)     | 14.7 $\pm$ 2.57<br>(58.9 $\pm$ 31.4)    | 18.0 $\pm$ 11.2<br>(128 $\pm$ 65.0)    | 10.3 $\pm$ 10.7<br>(209 $\pm$ 255)      |
| Small intestine | N.D.<br>(N.C.)                           | 72.5 $\pm$ 52.3<br>(1353 $\pm$ 863)     | 135 $\pm$ 52.5<br>(464 $\pm$ 89.0)      | 372 $\pm$ 286<br>(2901 $\pm$ 2539)     | 127 $\pm$ 69.8<br>(2434 $\pm$ 1920)     |
| Large intestine | 4.00 $\pm$ 1.70<br>(70.4 $\pm$ 26.4)     | 6.67 $\pm$ 4.41<br>(191 $\pm$ 244)      | 11.7 $\pm$ 8.10<br>(35.9 $\pm$ 4.23)    | 22.8 $\pm$ 13.1<br>(166 $\pm$ 78.3)    | 12.4 $\pm$ 8.65<br>(242 $\pm$ 221)      |
| Stomach         | 3.60 $\pm$ 0.400<br>(58.0 $\pm$ 11.2)    | 76.8 $\pm$ 36.3<br>(2066 $\pm$ 2394)    | 92.4 $\pm$ 46.4<br>(412 $\pm$ 304)      | 37.3 $\pm$ 20.6<br>(296 $\pm$ 201)     | 68.6 $\pm$ 78.9<br>(1066 $\pm$ 1242)    |
| Lung            | 6.40 $\pm$ 0.400<br>(103 $\pm$ 18.4)     | 9.33 $\pm$ 2.89<br>(174 $\pm$ 70.3)     | 13.9 $\pm$ 5.46<br>(47.7 $\pm$ 12.7)    | 53.3 $\pm$ 39.6<br>(424 $\pm$ 368)     | 2.53 $\pm$ 1.29<br>(48.0 $\pm$ 36.2)    |
| Heart           | 3.33 $\pm$ 0.611<br>(54.5 $\pm$ 16.8)    | 8.40 $\pm$ 4.21<br>(141 $\pm$ 24.4)     | 7.73 $\pm$ 3.78<br>(25.9 $\pm$ 4.21)    | 17.6 $\pm$ 5.66<br>(125 $\pm$ 53.7)    | 6.40 $\pm$ 5.09<br>(133 $\pm$ 129)      |
| Brain           | 0.138 $\pm$ 0.0195<br>(2.13 $\pm$ 0.246) | 0.312 $\pm$ 0.0516<br>(7.50 $\pm$ 6.88) | 0.508 $\pm$ 0.435<br>(2.03 $\pm$ 1.64)  | 1.12 $\pm$ 0.891<br>(8.31 $\pm$ 6.76)  | 0.983 $\pm$ 0.721<br>(19.3 $\pm$ 18.5)  |
| Fat             | 0.102 $\pm$ 0.0600<br>(1.84 $\pm$ 1.17)  | 0.564 $\pm$ 0.862<br>(22.5 $\pm$ 37.5)  | 0.354 $\pm$ 0.318<br>(1.86 $\pm$ 2.39)  | 0.859 $\pm$ 1.00<br>(6.57 $\pm$ 7.45)  | 0.191 $\pm$ 0.0223<br>(3.42 $\pm$ 1.19) |
| <b>2 h</b>      |                                          |                                         |                                         |                                        |                                         |
| Plasma          | 0.0135 $\pm$ 0.0400                      | 0.0182 $\pm$ 0.0024                     | 0.187 $\pm$ 0.0421                      | 0.0667 $\pm$ 0.0367                    | 0.0490 $\pm$ 0.0297                     |
| Liver*          | 1.60 $\pm$ 0.400<br>(128 $\pm$ 54.2)     | 2.53 $\pm$ 0.611<br>(139 $\pm$ 25.1)    | 15.6 $\pm$ 8.03<br>(84.4 $\pm$ 41.3)    | 25.2 $\pm$ 4.21<br>(488 $\pm$ 331)     | 16.9 $\pm$ 6.21<br>(380 $\pm$ 117)      |
| Kidney**        | N.D.<br>(N.C.)                           | N.D.<br>(N.C.)                          | 20.8 $\pm$ 6.73<br>(115 $\pm$ 49.0)     | 14.8 $\pm$ 1.06<br>(172 $\pm$ 32.4)    | 18.8 $\pm$ 10.4<br>(324 $\pm$ 34.1)     |
| Small intestine | N.D.<br>(N.C.)                           | 66.9 $\pm$ 24.8<br>(3864 $\pm$ 2031)    | 321 $\pm$ 283<br>(1635 $\pm$ 1479)      | 221 $\pm$ 292<br>(6923 $\pm$ 10961)    | 276 $\pm$ 196<br>(5344 $\pm$ 1378)      |
| Large intestine | N.D.<br>(N.C.)                           | 3.87 $\pm$ 1.89<br>(226 $\pm$ 144)      | 118 $\pm$ 110<br>(560 $\pm$ 489)        | 42.1 $\pm$ 23.1<br>(932 $\pm$ 815)     | 83.6 $\pm$ 86.4<br>(2029 $\pm$ 2417)    |
| Stomach         | 2.53 $\pm$ 0.231<br>(200 $\pm$ 68.3)     | 32.9 $\pm$ 23.1<br>(1959 $\pm$ 1639)    | 66.7 $\pm$ 49.6<br>(327 $\pm$ 195)      | 28.6 $\pm$ 3.11<br>(730 $\pm$ 496)     | 38.2 $\pm$ 9.33<br>(691 $\pm$ 212)      |
| Lung            | 4.67 $\pm$ 1.97<br>(356 $\pm$ 171)       | 4.40 $\pm$ 0.693<br>(242 $\pm$ 8.89)    | 18.7 $\pm$ 17.9<br>(96.4 $\pm$ 93.9)    | 23.1 $\pm$ 10.6<br>(441 $\pm$ 332)     | 7.73 $\pm$ 7.55<br>(133 $\pm$ 77.7)     |
| Heart           | 1.07 $\pm$ 0.611<br>(75.3 $\pm$ 32.4)    | 2.27 $\pm$ 0.611<br>(129 $\pm$ 51.0)    | 7.80 $\pm$ 4.24<br>(40.4 $\pm$ 9.91)    | 10.0 $\pm$ 2.26<br>(264 $\pm$ 203)     | 7.87 $\pm$ 1.15<br>(191 $\pm$ 79.3)     |
| Brain           | 0.0936 $\pm$ 0.0187<br>(6.82 $\pm$ 1.29) | 0.375 $\pm$ 0.359<br>(20.1 $\pm$ 18.4)  | 0.370 $\pm$ 0.282<br>(2.03 $\pm$ 1.48)  | 0.953 $\pm$ 0.507<br>(22.0 $\pm$ 24.3) | 0.821 $\pm$ 0.611<br>(25.9 $\pm$ 26.7)  |
| Fat             | 0.150 $\pm$ 0.0803<br>(9.59 $\pm$ 2.62)  | 0.166 $\pm$ 0.0335<br>(9.44 $\pm$ 3.27) | 0.252 $\pm$ 0.130<br>(1.29 $\pm$ 0.410) | N.D.<br>(N.C.)                         | N.D.<br>(N.C.)                          |
| <b>4 h</b>      |                                          |                                         |                                         |                                        |                                         |
| Plasma          | 0.00907 $\pm$ 0.00231                    | 0.0348 $\pm$ 0.00356                    | 0.115 $\pm$ 0.0451                      | 0.106 $\pm$ 0.0361                     | 0.0612 $\pm$ 0.0283                     |
| Liver           | 0.800 $\pm$ 0.0001                       | 3.47 $\pm$ 0.462                        | 15.2 $\pm$ 7.73                         | 22.1 $\pm$ 13.1                        | 17.1 $\pm$ 4.60                         |

|                 |                 |                 |                  |               |               |
|-----------------|-----------------|-----------------|------------------|---------------|---------------|
|                 | (88.2 ± 28.1)   | (100 ± 5.94)    | (129 ± 24.6)     | (194 ± 63.0)  | (321 ± 173)   |
| Kidney*         | N.D.            | 3.00 ± 1.41     | 19.7 ± 5.40      | 27.7 ± 14.8   | 25.7 ± 4.81   |
|                 | (N.C.)          | (92.7 ± 49.1)   | (180 ± 47.6)     | (263 ± 112)   | (465 ± 148)   |
| Small intestine | N.D.            | 91.6 ± 12.1     | 187 ± 139        | 375 ± 284     | 246 ± 127     |
|                 | (N.C.)          | (2651 ± 436)    | (1813 ± 1748)    | (3991 ± 2865) | (4203 ± 1830) |
| Large intestine | N.D.            | 4.40 ± 1.20     | 241 ± 201        | 144 ± 102     | 187 ± 170     |
|                 | (N.C.)          | (125 ± 21.9)    | (2405 ± 2588)    | (1736 ± 1698) | (2566 ± 1602) |
| Stomach         | N.D.            | 10.1 ± 1.85     | 45.0 ± 52.9      | 68.2 ± 60.2   | 34.7 ± 15.4   |
|                 | (N.C.)          | (290 ± 34.9)    | (288 ± 293)      | (917 ± 1035)  | (695 ± 432)   |
| Lung            | 2.13 ± 0.611    | 3.47 ± 1.29     | 21.2 ± 23.2      | 20.6 ± 4.24   | 12.7 ± 3.45   |
|                 | (234 ± 16.0)    | (103 ± 45.6)    | (138 ± 124)      | (168 ± 57.6)  | (234 ± 112)   |
| Heart           | 0.533 ± 0.231   | 2.53 ± 1.01     | 17.8 ± 13.3      | 53.6 ± 61.7   | 9.33 ± 2.84   |
|                 | (57.3 ± 9.90)   | (75.3 ± 36.9)   | (126 ± 52.5)     | (504 ± 502)   | (169 ± 61.3)  |
| Brain*          | N.D.            | 0.147 ± 0.0710  | 1.21 ± 0.0322    | 1.67 ± 0.210  | 0.664 ± 0.237 |
|                 | (N.C.)          | (4.10 ± 2.26)   | (10.1 ± 4.21)    | (16.7 ± 4.26) | (14.0 ± 10.4) |
| Fat             | 0.0718 ± 0.0433 | 0.0652 ± 0.0173 | 0.353 ± 0.000849 | 0.366 ± 0.250 | 0.387 ± 0.326 |
|                 | (9.10 ± 5.00)   | (1.85 ± 0.337)  | (2.93 ± 1.15)    | (4.43 ± 4.39) | (10.6 ± 11.4) |

#### 8 h

|                 |                |                 |                 |                 |                 |
|-----------------|----------------|-----------------|-----------------|-----------------|-----------------|
| Plasma          | N.D.           | 0.0272 ± 0.0389 | 0.0710 ± 0.0250 | 0.0858 ± 0.0490 | 0.0879 ± 0.0212 |
| Liver           | N.D.           | 3.47 ± 1.80     | 6.80 ± 0.556    | 6.27 ± 1.01     | 6.40 ± 1.70     |
|                 | (N.C.)         | (50.7 ± 17.0)   | (120 ± 29.4)    | (93.2 ± 54.9)   | (66.3 ± 2.29)   |
| Kidney          | N.D.           | 2.80 ± 1.13     | 19.3 ± 5.52     | 11.9 ± 2.34     | 14.1 ± 3.89     |
|                 | (N.C.)         | (32.5 ± 19.9)   | (280 ± 49.7)    | (196 ± 164)     | (166 ± 56.9)    |
| Small intestine | N.D.           | 87.7 ± 34.1     | 16.4 ± 10.2     | 12.9 ± 4.64     | 59.7 ± 49.3     |
|                 | (N.C.)         | (1627 ± 1357)   | (251 ± 148)     | (172 ± 59.1)    | (706 ± 634)     |
| Large intestine | N.D.           | 38.5 ± 43.8     | 45.3 ± 28.6     | 48.0 ± 29.0     | 102 ± 127       |
|                 | (N.C.)         | (1028 ± 1549)   | (691 ± 477)     | (798 ± 779)     | (1228 ± 1606)   |
| Stomach         | N.D.           | 9.87 ± 2.41     | 17.6 ± 9.06     | 8.53 ± 3.84     | 18.4 ± 11.7     |
|                 | (N.C.)         | (165 ± 78.4)    | (250 ± 110)     | (110 ± 34.4)    | (227 ± 182)     |
| Lung            | 1.33 ± 0.611   | 4.00 ± 0.800    | 7.07 ± 7.49     | 10.9 ± 3.63     | 7.07 ± 4.09     |
|                 | (N.C.)         | (67.4 ± 33.5)   | (97.6 ± 102)    | (148 ± 54.6)    | (82.8 ± 55.1)   |
| Heart           | 8.00 ± 4.53    | 2.13 ± 0.833    | 3.60 ± 0.566    | 3.07 ± 0.611    | 3.80 ± 0.283    |
|                 | (N.C.)         | (32.4 ± 8.92)   | (60.8 ± 38.6)   | (52.7 ± 48.0)   | (50.4 ± 7.90)   |
| Brain           | N.D.           | 0.135 ± 0.00446 | 0.174 ± 0.0274  | 0.195 ± 0.145   | 0.402 ± 0.334   |
|                 | (N.C.)         | (2.42 ± 1.59)   | (2.68 ± 1.15)   | (2.44 ± 1.31)   | (5.24 ± 5.03)   |
| Fat             | 0.104 ± 0.0339 | 0.341 ± 0.178   | N.D.            | N.D.            | 0.192 ± 0.0624  |
|                 | (N.C.)         | (5.63 ± 1.87)   | (N.C.)          | (N.C.)          | (2.21 ± 0.726)  |

#### 10 h

|                 |        |                 |              |                 |                  |
|-----------------|--------|-----------------|--------------|-----------------|------------------|
| Plasma**        | N.D.   | 0.0674 ± 0.0282 | N.D.         | 0.0314 ± 0.0290 | 0.0160 ± 0.00453 |
| Liver           | N.D.   | 2.93 ± 1.29     | N.D.         | N.D.            | N.D.             |
|                 | (N.C.) | (43.5 ± 3.18)   | (N.C.)       | (N.C.)          | (N.C.)           |
| Kidney          | N.D.   | 3.20 ± 0.0001   | 4.40 ± 2.26  | 3.80 ± 3.11     | 3.20 ± 1.13      |
|                 | (N.C.) | (42.9 ± 14.7)   | (N.C.)       | (131 ± 22.0)    | (219 ± 133)      |
| Small intestine | N.D.   | 15.2 ± 11.3     | N.D.         | 7.60 ± 2.83     | 7.20 ± 2.83      |
|                 | (N.C.) | (201 ± 49.5)    | (N.C.)       | (349 ± 232)     | (443 ± 51.6)     |
| Large intestine | N.D.   | 12.5 ± 5.00     | 8.80 ± 0.566 | 30.0 ± 18.7     | 24.0 ± 21.5      |
|                 | (N.C.) | (205 ± 119)     | N.D.         | (2144 ± 2574)   | (1760 ± 1841)    |
| Stomach         | N.D.   | 5.87 ± 3.26     | 2.20 ± 0.849 | 21.0 ± 25.2     | 3.60 ± 0.566     |
|                 | (N.C.) | (84.5 ± 12.2)   | N.D.         | (521 ± 321)     | (240 ± 103)      |

|       |                           |                               |                        |                                 |                                 |
|-------|---------------------------|-------------------------------|------------------------|---------------------------------|---------------------------------|
| Lung  | 2.00 ± 0.001<br>(N.C.)    | 7.33 ± 1.40<br>(125 ± 68.2)   | 5.00 ± 0.849<br>(N.C.) | 10.4 ± 0.001<br>(577 ± 533)     | 5.80 ± 1.41<br>(391 ± 199)      |
| Heart | 4.80 ± 2.26<br>(N.C.)     | 1.07 ± 0.462<br>(19.4 ± 15.3) | N.D.<br>(N.C.)         | N.D.<br>(N.C.)                  | N.D.<br>(N.C.)                  |
| Brain | N.D.<br>(N.C.)            | N.D.<br>(N.C.)                | N.D.<br>(N.C.)         | 0.126 ± 0.0325<br>(6.17 ± 4.66) | 0.132 ± 0.0359<br>(8.94 ± 4.77) |
| Fat   | 0.0871 ± 0.0139<br>(N.C.) | N.D.<br>(N.C.)                | N.D.<br>(N.C.)         | N.D.<br>(N.C.)                  | N.D.<br>(N.C.)                  |

\*MBR-NDA and MBR-PG mice were significantly different ( $p < 0.05$ ) from MBR mice.

\*\*MBR-EFA and MBR-PG mice were significantly different ( $p < 0.05$ ) from MBR mice.

\*MBR-NDA mice was significantly different ( $p < 0.05$ ) from MBR mice.
